# Supplementary material
Source: publisher figshare collection journal article supplement (https://acs.figshare.com/ndownloader/files/15544304)
Supplement: Supplementary file 1 [file 15544304]

Supporting Information:

Toward Prediction of Nonradiative Decay  
Pathways in Organic Compounds I: The Case  
of Naphthalene Quantum Yields

Alexander W. Kohn,<sup>†,‡</sup> Zhou Lin,<sup>†,‡</sup> and Troy Van Voorhis\*,<sup>†</sup>

<sup>†</sup>*Department of Chemistry, Massachusetts Institute of Technology, Cambridge, MA 02139*

<sup>‡</sup>*These authors contributed equally.*

E-mail: tvan@mit.edu

## CONTENTS:

1. Table S1: The absorption energy ( $E_{\text{abs}}$ ), the fluorescent energy ( $E_{\text{fl}}$ ), and the radiative rate ( $k_{\text{fl}}$ ) for family I from theory and experiments.
2. Table S2: The absorption energy ( $E_{\text{abs}}$ ), the fluorescent energy ( $E_{\text{fl}}$ ), and the radiative rate ( $k_{\text{fl}}$ ) for family II from theory and experiments.
3. Table S3: The experimental nonradiative rate ( $k_{\text{nr}}$ ) is compared against the theoretical direct intersystem crossing rate ( $k_{\text{ISC}}$ ) for family I. The theoretical values of the adiabatic energy gap ( $E_{\text{ISC}}$ ), the reorganization energy ( $\lambda_{\text{ISC}}$ ), and the Marcus-defined activation energy ( $E_{\text{ISC}}^{\ddagger}$ ) are also provided.
4. Table S4: The experimental nonradiative rate ( $k_{\text{nr}}$ ) is compared against the theoretical direct internal conversion rate ( $k_{\text{IC}}$ ) for family II. The theoretical values of the fluorescence energy ( $E_{\text{fl}}$ ), the reorganization energy ( $\lambda_{\text{IC}}$ , half of the Stokes shift), and the Marcus-defined activation energy ( $E_{\text{IC}}^{\ddagger}$ ) are also provided.
5. Figure S1: Comparison between the theoretical and experimental values for the absorption energy ( $E_{\text{abs}}$ ) for families I and II.
6. Figure S2: Energy gap law correlation between the total non-radiative rate ( $k_{\text{nr}}$ ) and the activation energy ( $E_{\text{a}}$ ) evaluated using the SF-DFT/BHHLYP approach. The activation energy is treated as the difference between the Frank-Condon (FC) minimum on the  $S_1$  surface and the  $S_1/S_0$  minimum energy conical intersection (MECI).
7. Figure S3: The squared transition dipole moments ( $|\mu|^2$ ) of the  $S_0 \rightarrow S_1$  and  $S_0 \rightarrow S_2$  transitions along the reaction path described in Figure 6 of the main text.  $S_1$  and  $S_2$  do not seem to switch in character.
8. Figure S4: The percentage of the largest natural transition orbital (NTOs) of the  $S_0 \rightarrow S_1$  and  $S_0 \rightarrow S_2$  transitions along the reaction path described in Figure 6 of the main text.  $S_1$  and  $S_2$  do not seem to switch in character.

**Table S1:**  $E_{\text{abs}}$ ,  $E_{\text{fl}}$ , and  $k_{\text{fl}}$  for family I from theory and experiments.

| #                                  | species | $E_{\text{abs}}$ (eV) |                   | $E_{\text{fl}}$ (eV) |                   | $\log_{10}(k_{\text{fl}}/\text{s}^{-1})$ |                   |
|------------------------------------|---------|-----------------------|-------------------|----------------------|-------------------|------------------------------------------|-------------------|
|                                    |         | theory                | expt <sup>a</sup> | theory               | expt <sup>a</sup> | theory <sup>f</sup>                      | expt <sup>a</sup> |
| <b>1</b>                           | NAPH    | 4.66                  | 4.31              | 4.27                 | 3.85              | 7.97                                     | 6.38              |
| <b>2</b>                           | 1MN     | 4.62                  | 4.39              | 4.18                 | 3.81              | 8.06                                     | 6.57              |
| <b>3</b>                           | 2MN     | 4.58                  | 4.31              | 4.17                 | 3.87              | 7.89                                     | 6.73              |
| <b>4</b>                           | 1HN     | 4.57                  | 4.28              | 4.03                 | 3.80              | 7.94                                     | 7.30              |
| <b>5</b>                           | 2HN     | 4.38                  | 4.34              | 4.01                 | 3.70              | 7.81                                     | 7.38              |
| <b>6</b>                           | 23DMN   | 4.53                  | 4.28              | 4.16                 | 3.86              | 7.85                                     | 6.69              |
| <b>7</b>                           | 26DMN   | 4.52                  | 4.36              | 4.19                 | 3.80              | 7.76                                     | 7.07              |
| <b>8</b>                           | 2PN     | 4.36                  | 4.29              | 3.92                 | 3.55              | 8.56                                     | 6.36              |
| <b>9</b>                           | 14DPN   | 4.20                  | 4.12              | 3.37                 | 3.26              | 8.66                                     | 8.33              |
| <b>10</b>                          | 15DPN   | 4.28                  | 4.10              | 3.50                 | 3.31              | 8.56                                     | 8.48              |
| <b>11</b>                          | 17DPN   | 4.20                  | 4.17              | 3.42                 | 3.40              | 8.38                                     | 7.18              |
| <b>12</b>                          | ACN     | 4.58                  | 4.30              | 4.13                 | 3.86              | 8.10                                     | 7.29              |
| $\langle \Delta_X \rangle^{b,c}$   |         | 0.19                  |                   | 0.27                 |                   | 0.98                                     |                   |
| $\langle  \Delta_X  \rangle^{b,d}$ |         | 0.19                  |                   | 0.27                 |                   | 0.98                                     |                   |

<sup>a</sup> Experimental values are reported by Berlman *et al.*<sup>S1</sup>

<sup>b</sup>  $\Delta_X = X_{\text{theory}} - X_{\text{expt}}$ .  $X = E_{\text{abs}}$ ,  $E_{\text{fl}}$ , or  $k_{\text{fl}}$ .

<sup>c</sup> Mean signed error (MSE).

<sup>d</sup> Mean absolute error (MAE).

<sup>f</sup> Kasha emission  $S_1 \rightarrow S_0$ .

**Table S2:**  $E_{\text{abs}}$ ,  $E_{\text{fl}}$ , and  $k_{\text{fl}}$  for family II from theory and experiments.

| #         | species                            | $E_{\text{abs}}$ (eV) |      | $E_{\text{fl}}$ (eV) |      | $\log_{10}(k_{\text{fl}}/\text{s}^{-1})$ |      |
|-----------|------------------------------------|-----------------------|------|----------------------|------|------------------------------------------|------|
|           |                                    | theory                | expt | theory               | expt | theory <sup>g</sup>                      | expt |
| <b>13</b> | 1AN <sup>a</sup>                   | 4.25                  | 3.90 | 3.60                 | 3.29 | 7.82                                     | 7.82 |
| <b>14</b> | 1A4CNN <sup>a</sup>                | 4.18                  | 3.72 | 3.74                 | 3.22 | 8.17                                     | 8.15 |
| <b>15</b> | 1A4CLN <sup>a</sup>                | 4.12                  | 3.79 | 3.48                 | 3.19 | 7.88                                     | 7.88 |
| <b>16</b> | 1A4MN <sup>a</sup>                 | 4.14                  | 3.82 | 3.44                 | 3.18 | 7.82                                     | 7.72 |
| <b>17</b> | 1MAN <sup>a</sup>                  | 4.14                  | 3.72 | 3.52                 | 3.23 | 7.87                                     | 7.80 |
| <b>18</b> | 1DMAN <sup>b</sup>                 | 4.18                  | 4.07 | 3.54                 | 3.22 | 7.97                                     | 7.93 |
| <b>19</b> | 1DMA4CNN <sup>a</sup>              | 4.00                  | 3.69 | 3.57 <sup>h</sup>    | 3.17 | 8.27 <sup>h</sup>                        | 8.54 |
| <b>20</b> | 1DMA4CLN <sup>a</sup>              | 4.06                  | 3.89 | 3.44                 | 3.14 | 8.03                                     | 8.03 |
| <b>21</b> | 1DMA4MN <sup>a</sup>               | 4.11                  | 3.96 | 3.42                 | 3.14 | 7.95                                     | 7.92 |
| <b>22</b> | 1DMA4MON <sup>b</sup>              | 4.06                  | 3.77 | 3.23                 | 3.01 | 7.82                                     | 7.90 |
| <b>23</b> | 1DMA5MON <sup>b</sup>              | 4.28                  | 4.08 | 3.73                 | 3.35 | 8.22                                     | 7.90 |
| <b>24</b> | 1DMA6MON <sup>b</sup>              | 4.11                  | 4.09 | 3.50                 | 3.22 | 7.95                                     | 7.86 |
| <b>25</b> | 1DMA7MON <sup>b</sup>              | 4.04                  | 4.22 | 3.42                 | 3.15 | 7.92                                     | 7.70 |
| <b>26</b> | 1NAZN <sup>c</sup>                 | 4.15                  | 3.80 | 3.55                 | 3.17 | 7.99                                     | 7.89 |
| <b>27</b> | 1NPYN <sup>c</sup>                 | 4.06                  | 3.90 | 3.54 <sup>h</sup>    | 3.21 | 8.01 <sup>h</sup>                        | 7.94 |
|           | $\langle \Delta_X \rangle^{d,e}$   | 0.23                  |      | 0.32                 |      | 0.05                                     |      |
|           | $\langle  \Delta_X  \rangle^{d,f}$ | 0.26                  |      | 0.32                 |      | 0.05                                     |      |

<sup>a</sup> Experimental values are reported by Suzuki *et al.*<sup>S2</sup>

<sup>b</sup> Experimental values are reported by Takehira *et al.*<sup>S3</sup>

<sup>c</sup> Experimental values are reported by Rückert *et al.*<sup>S4</sup>

<sup>d</sup>  $\Delta_X = X_{\text{theory}} - X_{\text{expt}}$ .  $X = E_{\text{abs}}$ ,  $E_{\text{fl}}$ , or  $k_{\text{fl}}$ .

<sup>e</sup> Mean signed error (MSE).

<sup>f</sup> Mean absolute error (MAE).

<sup>g</sup> Kasha emission  $S_1 \rightarrow S_0$ .

<sup>h</sup> These values are evaluated at an  $S_1$  geometry optimized using a range-separated variant of PBE with 50% Hartree–Fock exchange in the short-range and  $\omega = 0.2 \text{ bohr}^{-1}$  as the species collapsing into an unphysical charge-transfer excited state.

**Table S3: The experimental  $k_{\text{nr}}$  is compared against the theoretical direct  $k_{\text{ISC}}$  for family I. The theoretical values of  $E_{\text{ISC}}$ ,  $\lambda_{\text{ISC}}$ , and  $E_{\text{ISC}}^{\ddagger}$  are also provided.**

| #         | Species | $\log_{10}(k_{\text{nr}}/\text{s}^{-1})^a$ | $\log_{10}(k_{\text{ISC}}/\text{s}^{-1})^b$ | $E_{\text{ISC}}$ (eV) | $\lambda_{\text{ISC}}$ (eV) | $E_{\text{ISC}}^{\ddagger}$ (eV) |
|-----------|---------|--------------------------------------------|---------------------------------------------|-----------------------|-----------------------------|----------------------------------|
|           |         | expt <sup>a</sup>                          | theory                                      | theory                | theory                      | theory                           |
| <b>1</b>  | NAPH    | 6.90                                       | 6.92                                        | 1.41                  | 0.26                        | 2.71                             |
| <b>2</b>  | 1MN     | 7.05                                       | 7.08                                        | 1.36                  | 0.25                        | 2.58                             |
| <b>3</b>  | 2MN     | 7.06                                       | 7.36                                        | 1.39                  | 0.26                        | 2.63                             |
| <b>4</b>  | 1HN     | 7.87                                       | 7.43                                        | 1.26                  | 0.25                        | 2.30                             |
| <b>5</b>  | 2HN     | 7.71                                       | 7.86                                        | 1.29                  | 0.26                        | 2.32                             |
| <b>6</b>  | 23DMN   | 6.90                                       | 7.65                                        | 1.37                  | 0.25                        | 2.60                             |
| <b>7</b>  | 26DMN   | 7.16                                       | 7.62                                        | 1.35                  | 0.24                        | 2.63                             |
| <b>8</b>  | 2PN     | 6.81                                       | 7.12                                        | 1.17                  | 0.29                        | 1.83                             |
| <b>9</b>  | 14DPN   | 8.51                                       | 7.96                                        | 1.00                  | 0.30                        | 1.41                             |
| <b>10</b> | 15DPN   | 8.42                                       | 7.74                                        | 1.02                  | 0.25                        | 1.61                             |
| <b>11</b> | 17DPN   | 7.23                                       | 7.07                                        | 0.98                  | 0.26                        | 1.46                             |
| <b>12</b> | CAN     | 7.12                                       | 6.92                                        | 1.31                  | 0.25                        | 2.42                             |

<sup>a</sup> Experimental values are reported by Berlman *et al.*<sup>S1</sup>

<sup>b</sup> Theoretical values in this work are predicted using Equation 5 in the main text with  $B = 8.32 \times 10^6 \text{ s}^{-1}$  and  $C = 1.66 \times 10^7 \text{ s}^{-1} \text{ cm}^2$ , respectively.

**Table S4: The experimental  $k_{\text{nr}}$  is compared against the theoretical direct  $k_{\text{IC}}$  for family II. The theoretical values of  $E_{\text{fl}}$ ,  $\lambda_{\text{IC}}$ , and  $E_{\text{IC}}^{\ddagger}$  are also provided.**

| #         | Species               | $\log_{10}(k_{\text{IC}}/\text{s}^{-1})^{a,b,c}$ | $\log_{10}(k_{\text{IC}}/\text{s}^{-1})^d$ | $E_{\text{IC}}^e$ (eV) | $\lambda_{\text{IC}}$ (eV) | $E_{\text{IC}}^{\ddagger}$ (eV) |
|-----------|-----------------------|--------------------------------------------------|--------------------------------------------|------------------------|----------------------------|---------------------------------|
|           |                       | expt                                             | theory                                     | theory                 | theory                     | theory                          |
| <b>13</b> | 1AN <sup>a</sup>      | 7.92                                             | 7.39                                       | 3.61                   | 0.37                       | 10.80                           |
| <b>14</b> | 1A4CNN <sup>a</sup>   | 9.21                                             | 9.07                                       | 3.46                   | 0.26                       | 13.20                           |
| <b>15</b> | 1A4CLN <sup>a</sup>   | 8.25                                             | 7.54                                       | 3.47                   | 0.36                       | 10.21                           |
| <b>16</b> | 1A4MN <sup>a</sup>    | 7.49                                             | 6.52                                       | 3.49                   | 0.38                       | 9.81                            |
| <b>17</b> | 1MAN <sup>a</sup>     | 7.66                                             | 7.76                                       | 3.55                   | 0.35                       | 10.87                           |
| <b>18</b> | 1DMAN <sup>b</sup>    | 9.93                                             | 9.13                                       | 3.59                   | 0.40                       | 9.97                            |
| <b>19</b> | 1DMA4CNN <sup>a</sup> | 11.24                                            | 10.92                                      | 3.34                   | 0.29                       | 11.31                           |
| <b>20</b> | 1DMA4CLN <sup>a</sup> | 10.24                                            | 9.39                                       | 3.46                   | 0.39                       | 9.53                            |
| <b>21</b> | 1DMA4MN <sup>a</sup>  | 9.36                                             | 8.73                                       | 3.51                   | 0.42                       | 9.24                            |
| <b>22</b> | 1DMA4MON <sup>b</sup> | 8.45                                             | 8.36                                       | 3.44                   | 0.46                       | 8.34                            |
| <b>23</b> | 1DMA5MON <sup>b</sup> | 9.85                                             | 9.31                                       | 3.66                   | 0.34                       | 11.85                           |
| <b>24</b> | 1DMA6MON <sup>b</sup> | 9.85                                             | 8.26                                       | 3.49                   | 0.37                       | 10.16                           |
| <b>25</b> | 1DMA7MON <sup>b</sup> | 7.91                                             | -                                          | 3.45                   | 0.37                       | 9.84                            |
| <b>26</b> | 1NAZN <sup>c</sup>    | 8.68                                             | 9.72                                       | 3.52                   | 0.36                       | 10.56                           |
| <b>27</b> | 1NPYN <sup>c</sup>    | 10.09                                            | 11.29                                      | 3.50                   | 0.32                       | 11.52                           |

<sup>a</sup> Experimental values are reported by Suzuki *et al.*<sup>S2</sup>

<sup>b</sup> Experimental values are reported by Takehira *et al.*<sup>S3</sup>

<sup>c</sup> Experimental values are reported by Rückert *et al.*<sup>S4</sup>

<sup>d</sup> Theoretical values in this work are predicted using Equation 5 in the main text with  $A_{\text{IC}} = 2.02 \times 10^{12} \text{ s}^{-1}$  and a slope of  $-8.18 \text{ eV}^{-1}$ .

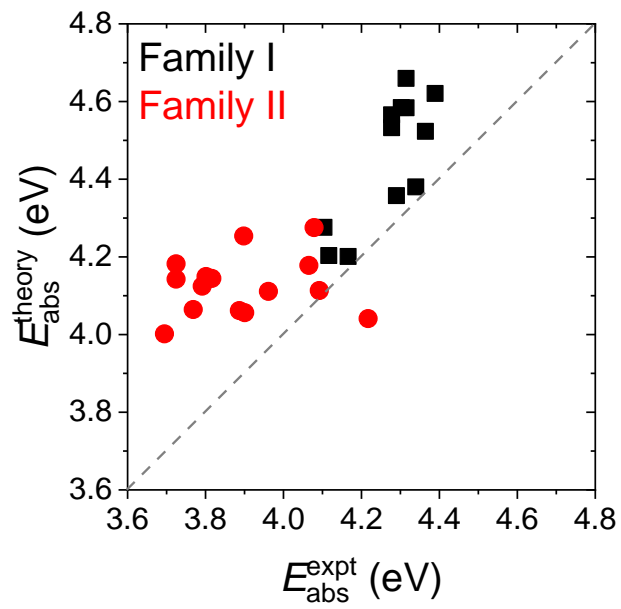

Figure S1: Comparison between the theoretical and experimental values for  $E_{\text{abs}}$  for families I (black squares) and II (red circles).

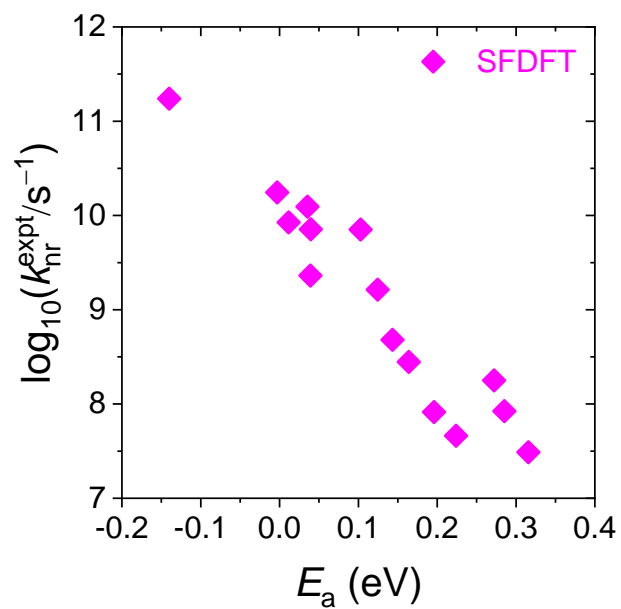

Figure S2: Energy gap law correlation between  $k_{nr}$  and  $E_a$  evaluated using the SFDFT/BHHLYP approach.  $E_a$  is treated as the difference between the FC minimum on the  $S_1$  surface and the  $S_1/S_0$  MECI.



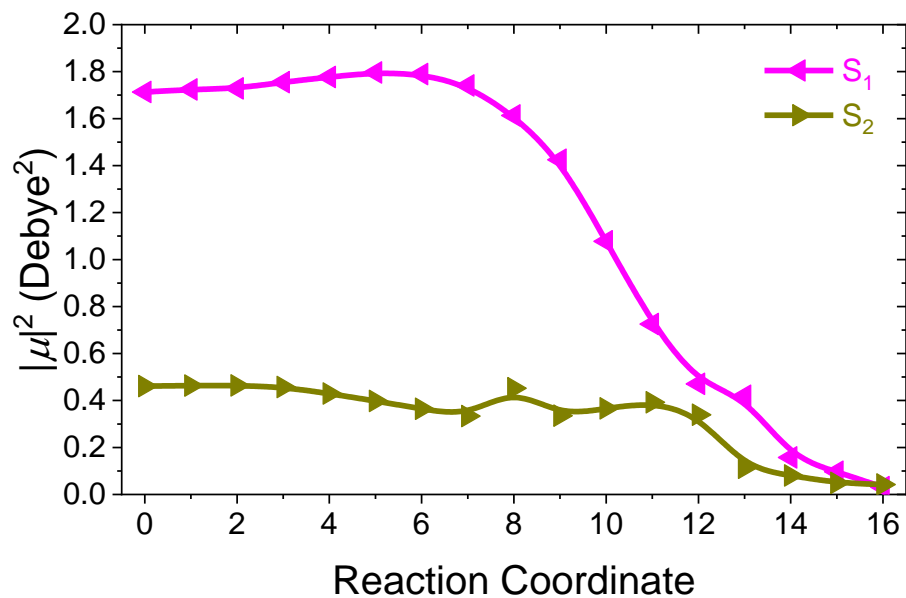

Figure S3:  $|\mu|^2$ 's of the  $S_0 \rightarrow S_1$  and  $S_0 \rightarrow S_2$  transitions along the reaction path described in Figure 6 of the main text.  $S_1$  and  $S_2$  do not seem to switch in character.

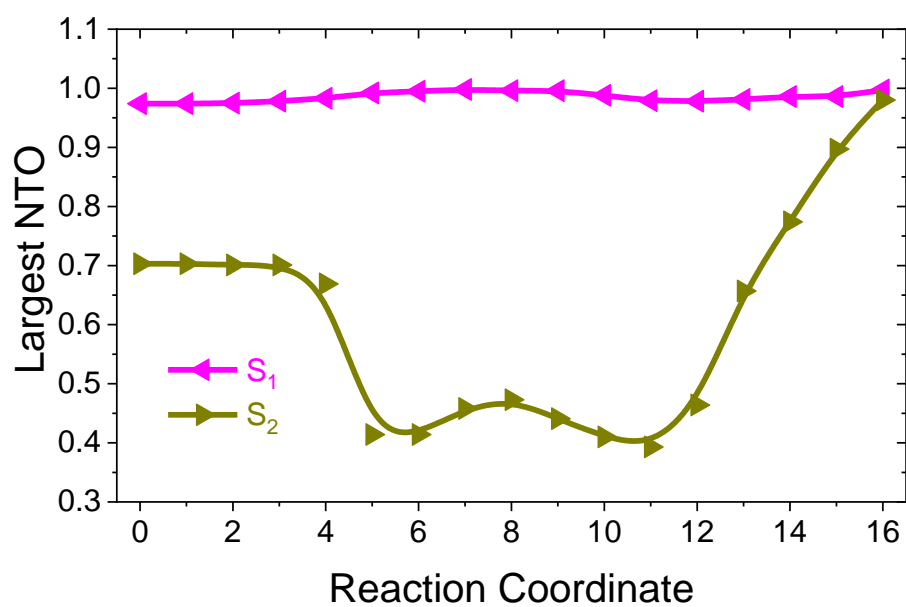

Figure S4: The percentage of the largest NTOs of the  $S_0 \rightarrow S_1$  and  $S_0 \rightarrow S_2$  transitions along the reaction path described in Figure 6 of the main text.  $S_1$  and  $S_2$  do not seem to switch in character.

## References

- (S1) Berlman, I. B. In *Handbook of Fluorescence Spectra of Aromatic Molecules*, 2nd ed.; Berlman, I. B., Ed.; Academic Press, 1971; pp 107–415.
- (S2) Suzuki, K.; Demeter, A.; Kühnle, W.; Tauer, E.; Zachariasse, K. A.; Tobita, S.; Shizuka, H. Internal conversion in 4-substituted 1-naphthylamines. Influence of the electron donor/acceptor substituent character. *Phys. Chem. Chem. Phys.* **2000**, *2*, 981–991.
- (S3) Takehira, K.; Suzuki, K.; Hiratsuka, H.; Tobita, S. Fast internal conversion in 1-(dimethylamino)naphthalene: Effects of methoxy substitution on the naphthalene ring. *Chem. Phys. Lett.* **2005**, *413*, 52–58.
- (S4) Rückert, I.; Demeter, A.; Morawski, O.; Kühnle, W.; Tauer, E.; Zachariasse, K. A. Internal conversion in 1-aminonaphthalenes. Influence of amino twist angle. *J. Phys. Chem. A* **1999**, *103*, 1958–1966.
